# Supplementary material
Source: PubMed Central journal article supplement (PMC7705965)
Supplement: jm0c01202_si_001.pdf [file jm0c01202_si_001.pdf]

## Supporting Information

### Peptide inhibitors of the $\alpha$ -cobratoxin–nicotinic acetylcholine receptor interaction

Timothy Lynagh, Stephan Kiontke, Maria Meyhoff-Madsen, Bengt H. Gless, Jónas Johannesen, Sabrina Kattelmann, Anders Christiansen, Martin Dufva, Andreas H. Laustsen, Kanchan Devkota, Christian A. Olsen, Daniel Kümmel, Stephan Alexander Pless, Brian Lohse

#### Contents

|                                                                                                                             |     |
|-----------------------------------------------------------------------------------------------------------------------------|-----|
| Figure S1. Effects of additional peptides on $\alpha$ -cobratoxin inhibition of nAChRs. ....                                | S2  |
| Figure S2. Chemical stability of peptide 1 and 12. ....                                                                     | S3  |
| Figure S3. Architecture of the 12: $\alpha$ -CbtX complex observed in the crystal structure (PDBID 6ZFM).....               | S4  |
| Figure S4. Structurally homologous $\alpha$ -neurotoxin binding interactions with other proteins. ....                      | S5  |
| Figure S5. HPLC chromatogram and MS spectrum, peptide 1 .....                                                               | S6  |
| Figure S6. HPLC chromatogram and MS spectrum, peptide 2 .....                                                               | S6  |
| Figure S7. HPLC chromatogram and MS spectrum, peptide 3 .....                                                               | S7  |
| Figure S8. HPLC chromatogram and MS spectrum, peptide 4 .....                                                               | S7  |
| Figure S9. HPLC chromatogram and MS spectrum, peptide 5 .....                                                               | S8  |
| Figure S10. HPLC chromatogram and MS spectrum, peptide 6.....                                                               | S8  |
| Figure S11. HPLC chromatogram and MS spectrum, peptide 7.....                                                               | S9  |
| Figure S12. HPLC chromatogram and MS spectrum, peptide 8.....                                                               | S9  |
| Figure S13. HPLC chromatogram and MS spectrum, peptide 9.....                                                               | S10 |
| Figure S14. HPLC chromatogram and MS spectrum, peptide 10.....                                                              | S11 |
| Figure S15. HPLC chromatogram and MS spectrum, peptide 11.....                                                              | S12 |
| Figure S16. HPLC chromatogram and MS spectrum, peptide 12.....                                                              | S13 |
| Figure S17. HPLC chromatogram and MS spectrum, peptide 13.....                                                              | S14 |
| Figure S18. HPLC chromatogram and MS spectrum, peptide 14.....                                                              | S15 |
| Figure S19. HPLC chromatogram and MS spectrum, peptide 15.....                                                              | S16 |
| Figure S20. HPLC chromatogram and MS spectrum, peptide 16.....                                                              | S17 |
| Figure S21. HPLC chromatogram and MS spectrum, peptide 17.....                                                              | S18 |
| Figure S22. HPLC chromatogram and MS spectrum, peptide 18.....                                                              | S19 |
| Table S1. Data processing and refinement statistics for the structure determination of the 12: $\alpha$ -CbtX complex. .... | S20 |

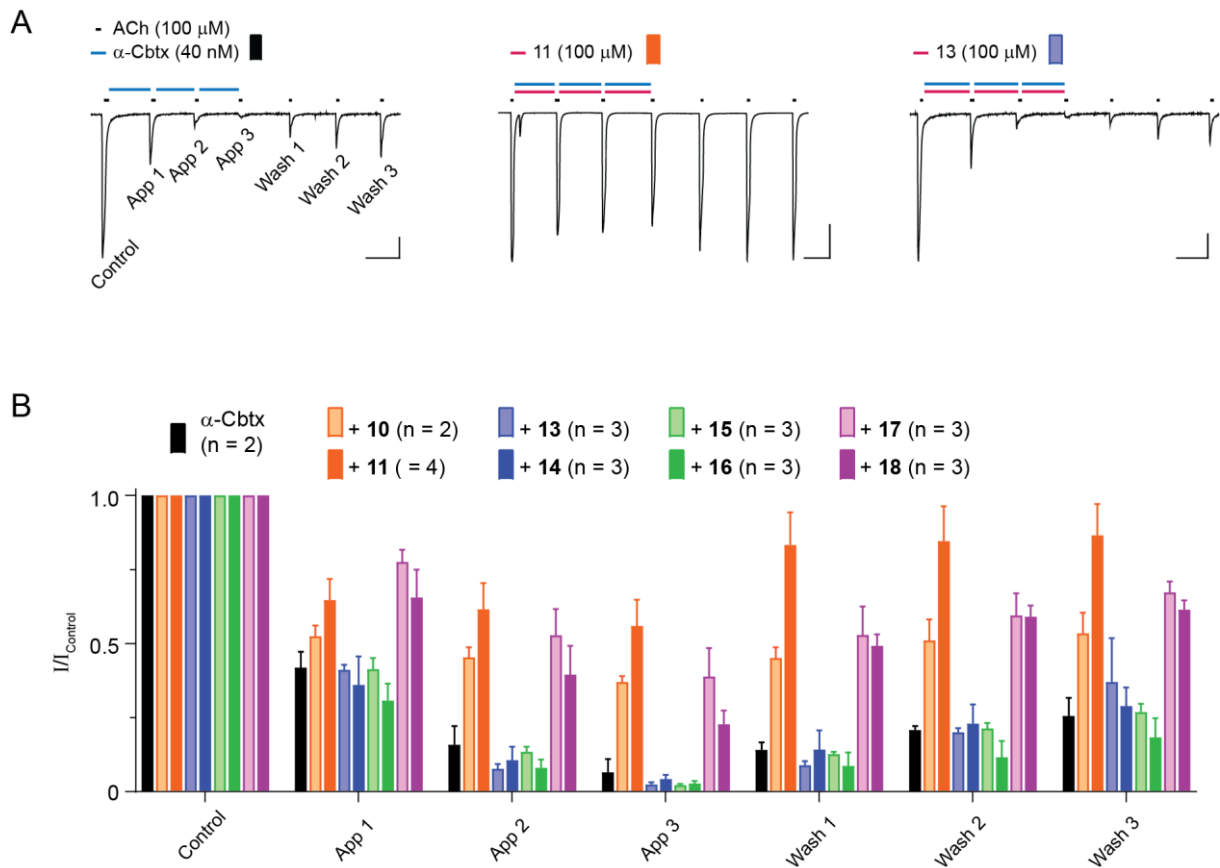

**Figure S1. Effects of additional peptides on  $\alpha$ -cobratoxin inhibition of nAChRs. Related to Table 1.**

(A) Example two electrode voltage clamp recordings of acetylcholine (ACh)-gated currents in *Xenopus laevis* oocytes expressing L247V mutant  $\alpha 7$  ACh receptors and RIC-3 (see *Experimental Section, Electrophysiological Assays*). Scale bars: x, 1 min; y, 1  $\mu$ A. ACh was applied for 10 s in regular conditions (“x” or “control”) and then three times after the application of either  $\alpha$ -Cbtx (blue bars) or  $\alpha$ -Cbtx with peptide (blue and magenta bars). After this, ACh was applied three more times to observe washout of any effects.

(B) Normalized, mean (n = 2-4) data from experiments illustrated in (A) for various peptides (see Table 1 for peptide sequences).

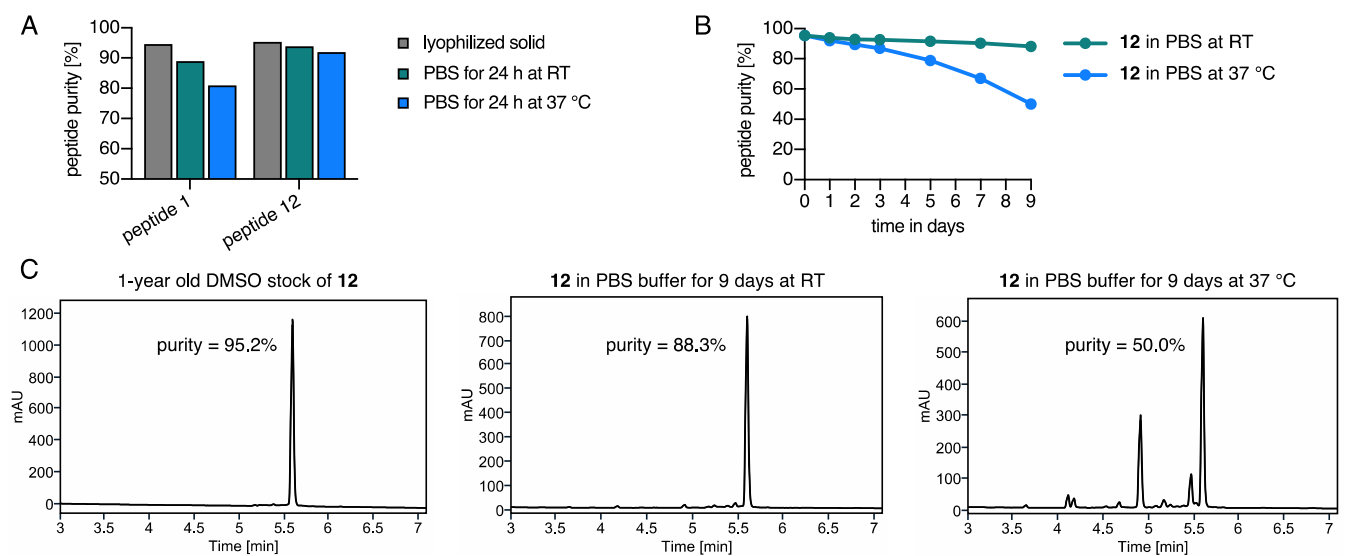

**Figure S2. Chemical stability of peptide 1 and 12.**

(A) Purities of peptide **1** and **12** after 24 h incubation in phosphate-buffered saline (PBS) buffer (pH = 7.4) at room temperature (RT) and 37 °C determined by HPLC ( $\lambda = 215$  nm). Peptide **1** precipitated after 24 h from the buffer and could not be analyzed for longer than 24 h.

(B) Stability of peptide **12** over 9 days in PBS buffer at RT and 37 °C determined by HPLC ( $\lambda = 215$  nm).

(C) HPLC chromatograms of **12** before and after 9 days of incubation in PBS buffer at RT and 37 °C.

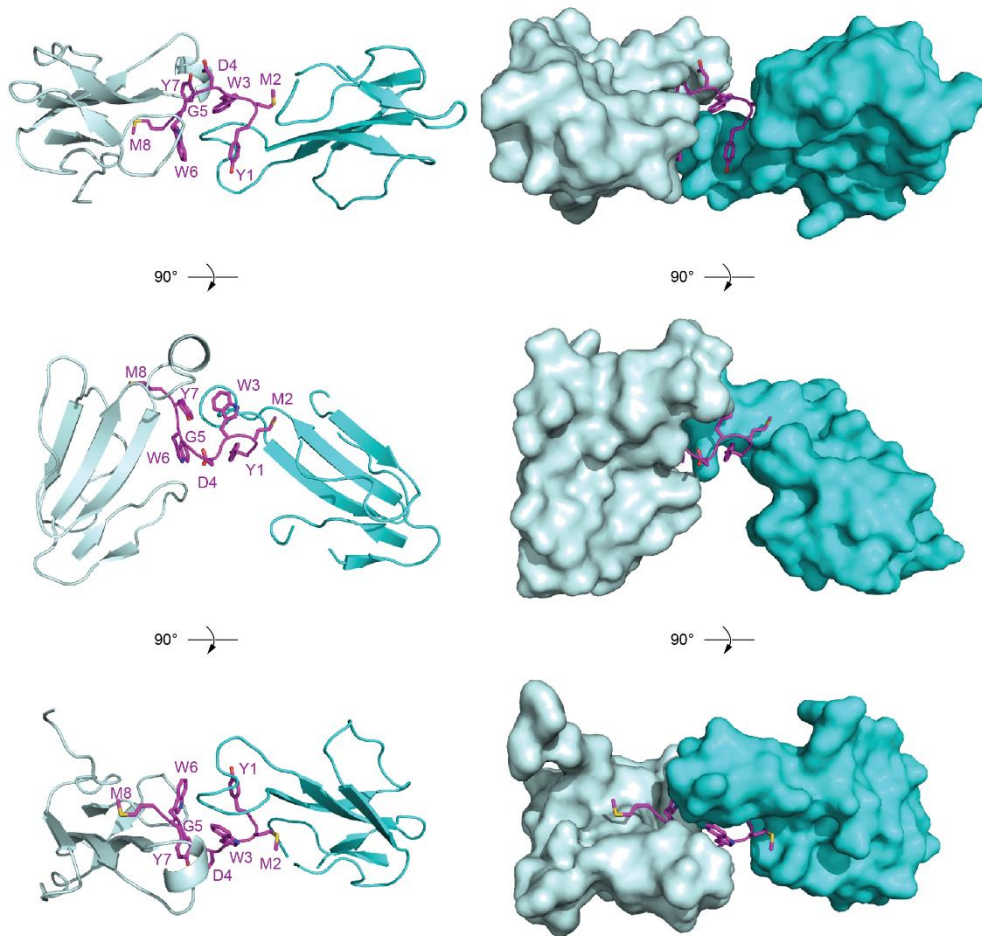

**Figure S3. Architecture of the 12:α-Cbtx complex observed in the crystal structure (PDBID 6ZFM).**

Two α-Cbtx molecules (light and dark cyan) bind one **12** ligand (magenta), which results in the formation of an asymmetrical dimer and two distinct binding interfaces. Top, side and bottom views are shown with α-Cbtx in cartoon (left) and surface (right) representation.

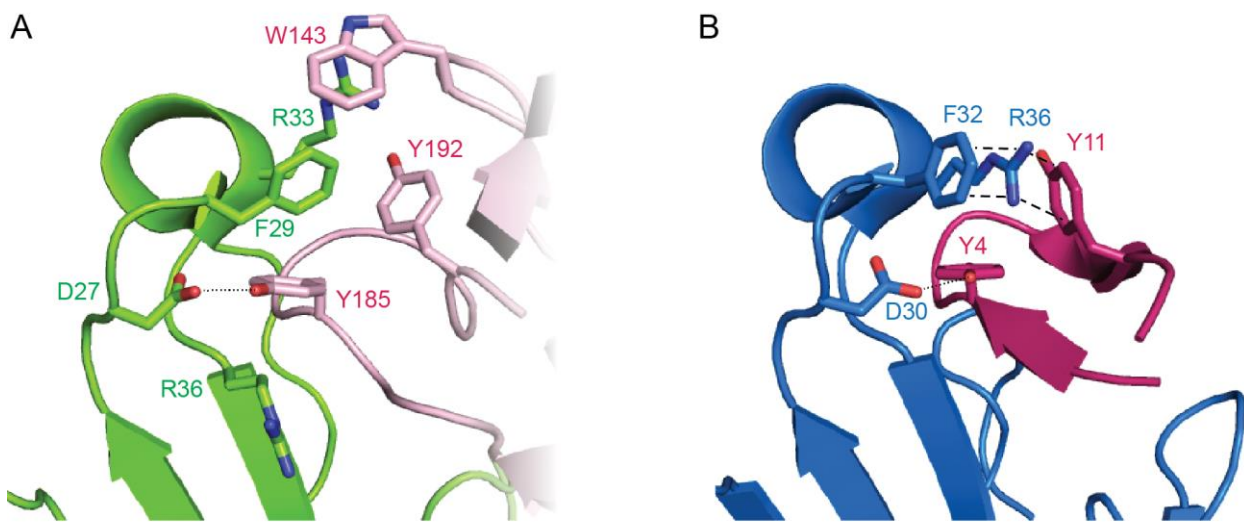

**Figure S4. Structurally homologous  $\alpha$ -neurotoxin binding interactions with other proteins.**

(A) Interaction of  $\alpha$ -Cbtx (green) loop II with acetylcholine binding protein (AChBP, pink) principal face (PDB 1Y15). Amino acid side chains shown as sticks, key interacting residues are labeled. Y-D hydrogen bond indicated by dashed line.

(B) Interaction of  $\alpha$ -Bgtx (blue) loop II with an inhibitory peptide (magenta) bearing structural homology to the  $\alpha$  subunit of the muscle nAChR (PDBID 1HC9). Cation- $\pi$  interactions of  $\alpha$ -Bgtx<sup>R36</sup> and the  $\alpha$ -Bgtx<sup>D30</sup>–peptide<sup>Y4</sup> hydrogen bond are highlighted by dashed and dotted lines, respectively.

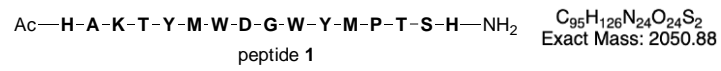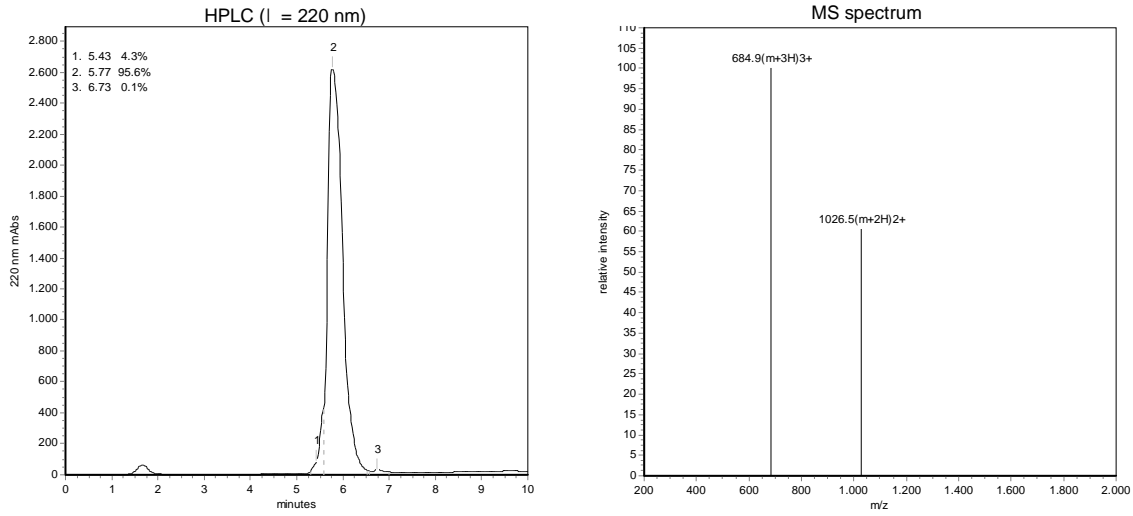

Figure S5. HPLC chromatogram and MS spectrum, peptide 1 (purchased from Schafer-N).

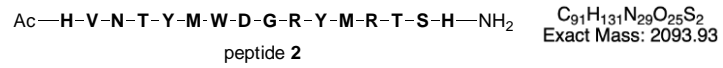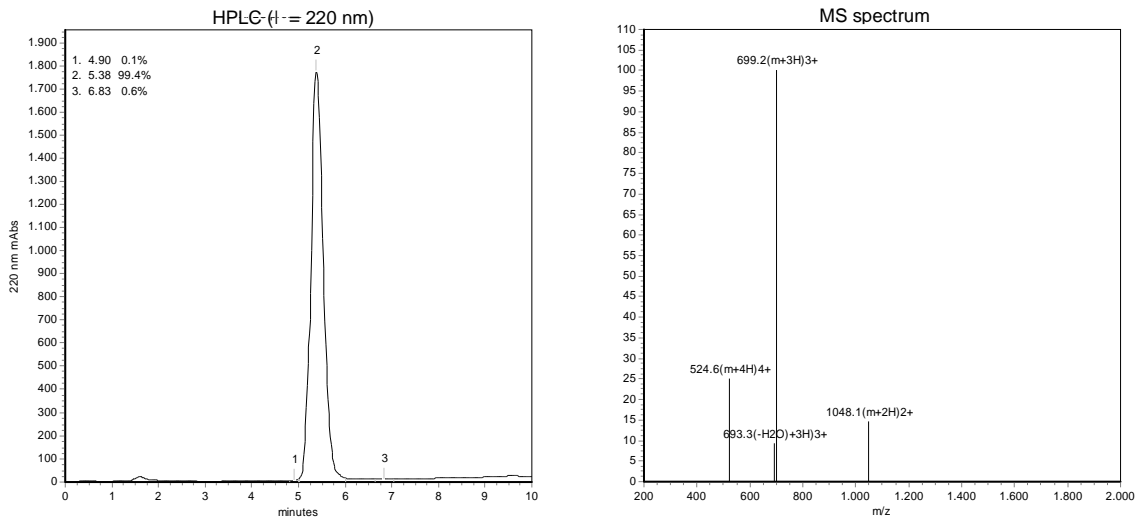

Figure S6. HPLC chromatogram and MS spectrum, peptide 2 (purchased from Schafer-N).

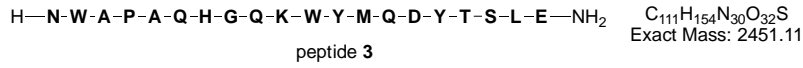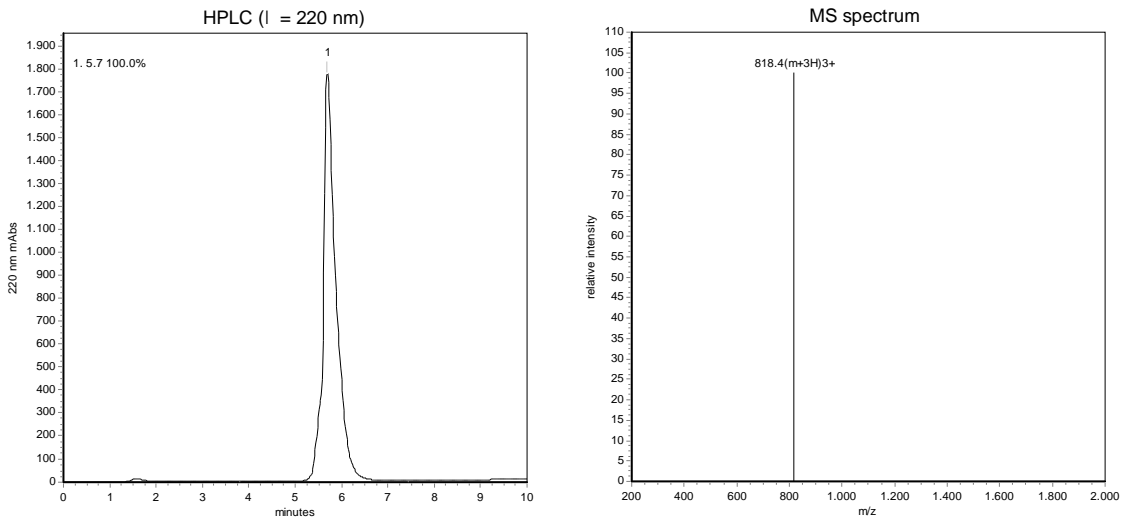

Figure S7. HPLC chromatogram and MS spectrum, peptide 3 (purchased from Schafer-N).

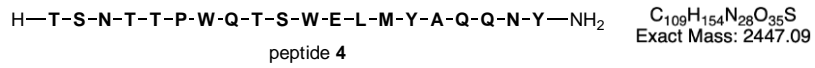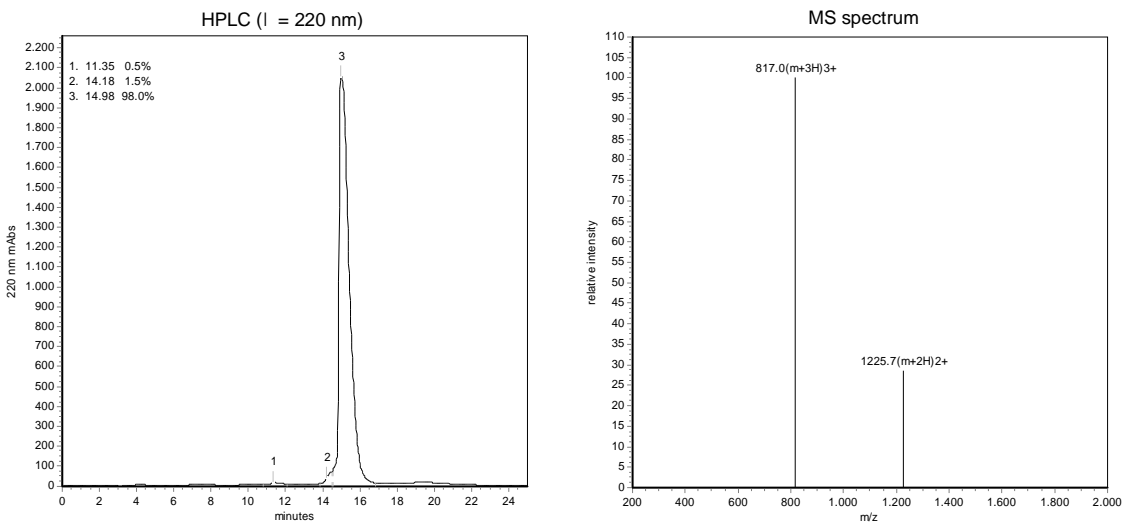

Figure S8. HPLC chromatogram and MS spectrum, peptide 4 (purchased from Schafer-N).

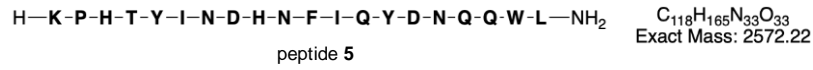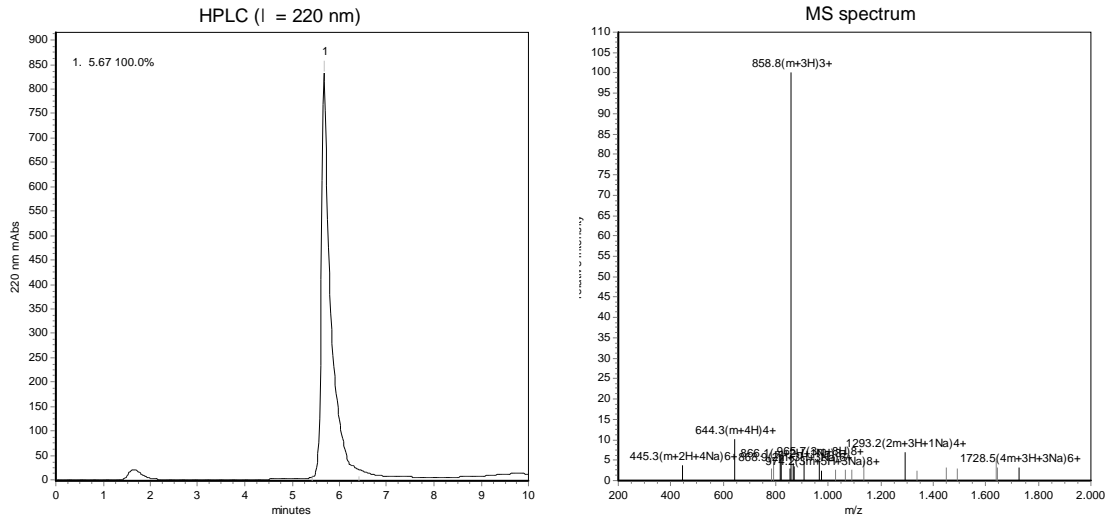

Figure S9. HPLC chromatogram and MS spectrum, peptide 5 (purchased from Schafer-N).

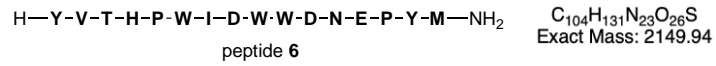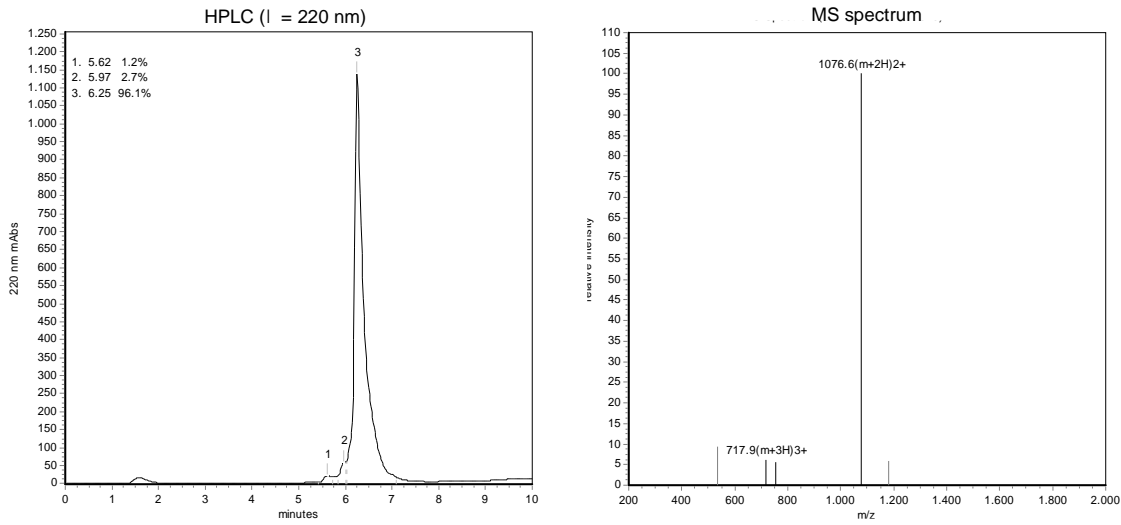

Figure S10. HPLC chromatogram and MS spectrum, peptide 6 (purchased from Schafer-N).



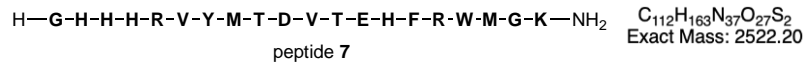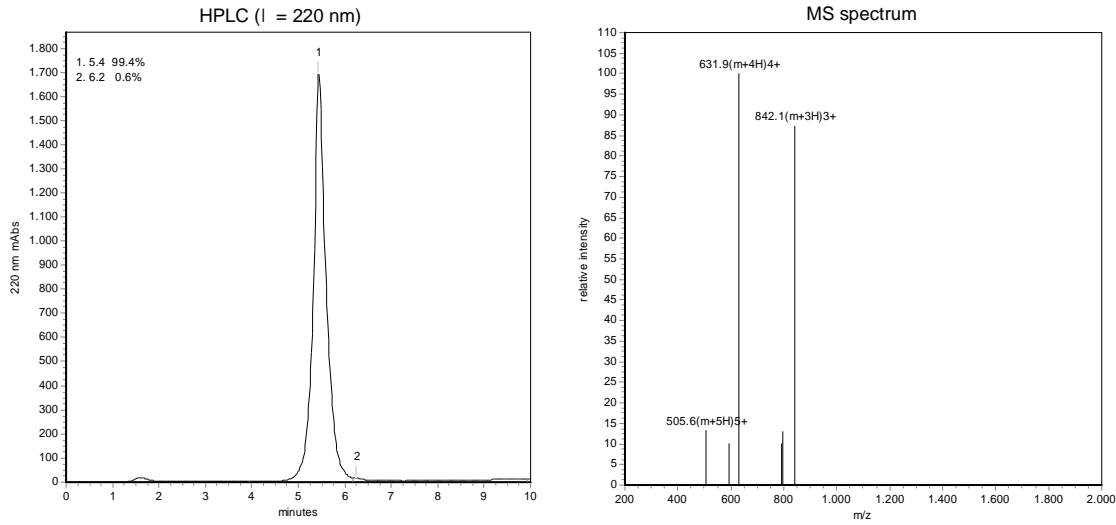

Figure S11. HPLC chromatogram and MS spectrum, peptide 7 (purchased from Schafer-N).

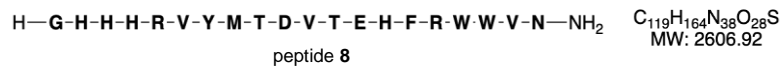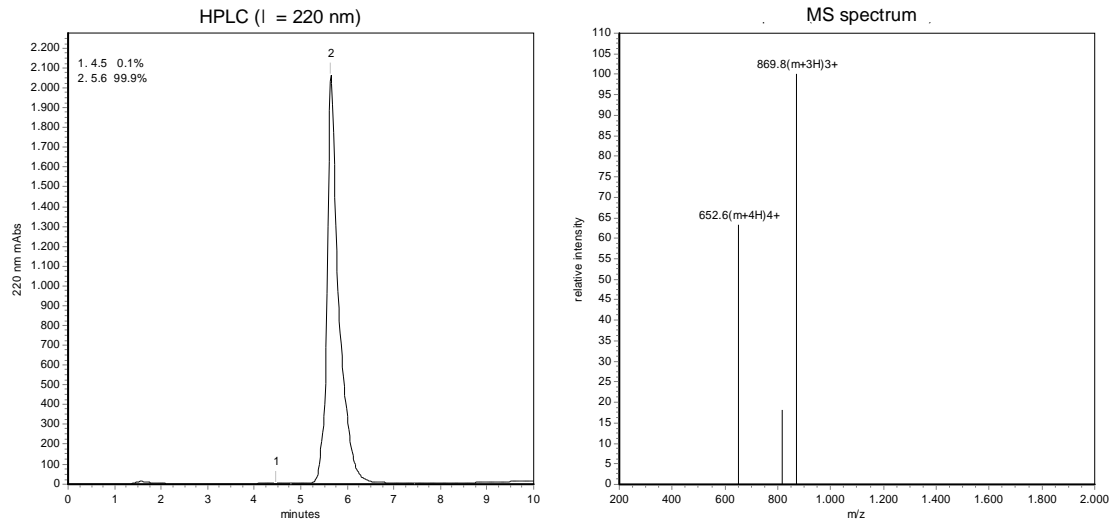

Figure S12. HPLC chromatogram and MS spectrum, peptide 8 (purchased from Schafer-N).

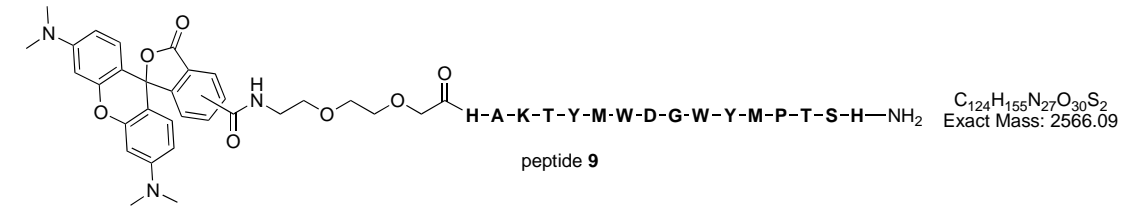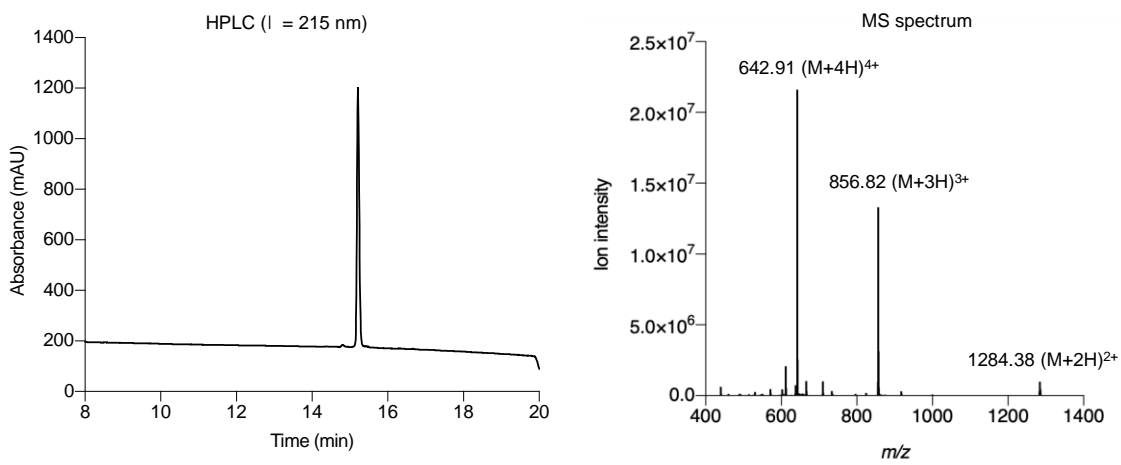

Figure S13. HPLC chromatogram and MS spectrum, peptide 9.

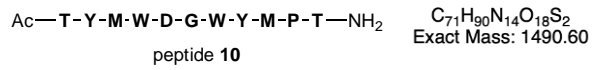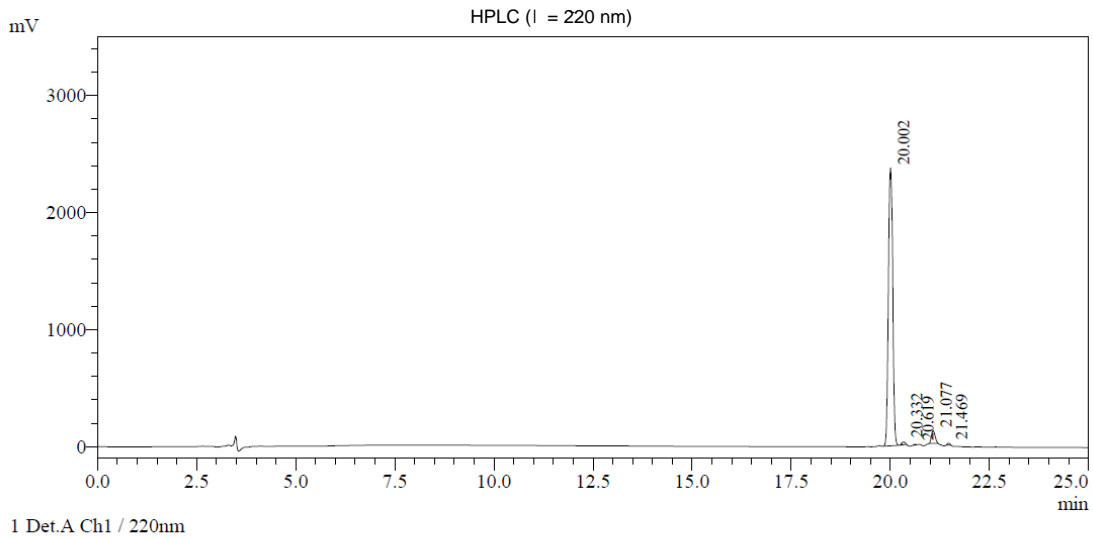

Peak Table

Detector A Ch1 220nm

| Peak# | Ret. Time | Area     | Height  | Area %  |
|-------|-----------|----------|---------|---------|
| 1     | 20.002    | 18178852 | 2372993 | 95.072  |
| 2     | 20.332    | 139272   | 25091   | 0.728   |
| 3     | 20.619    | 27270    | 6120    | 0.143   |
| 4     | 21.077    | 708124   | 108524  | 3.703   |
| 5     | 21.469    | 67705    | 15994   | 0.354   |
| Total |           | 19121223 | 2528721 | 100.000 |

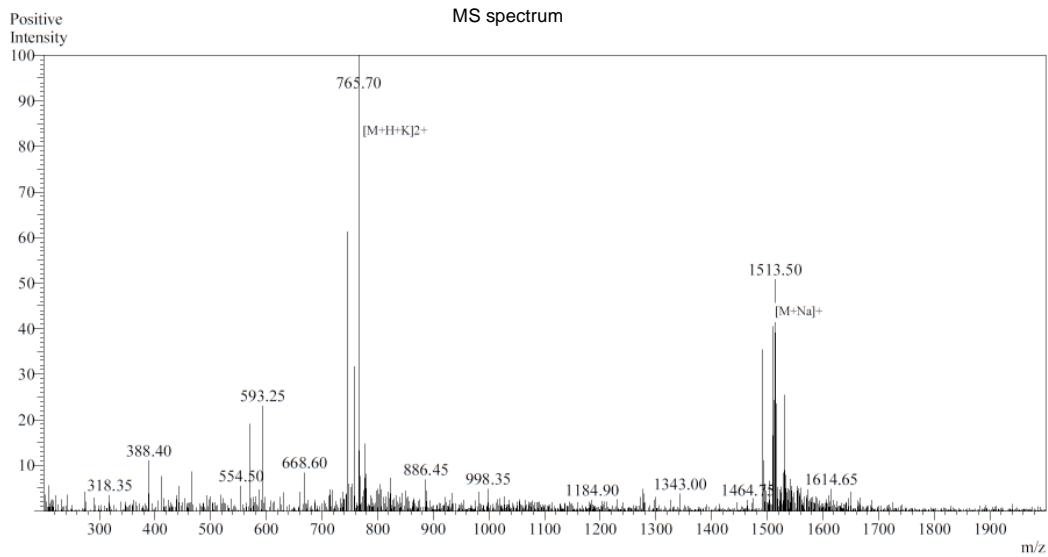

Figure S14. HPLC chromatogram and MS spectrum, peptide 10 (purchased from Genscript).

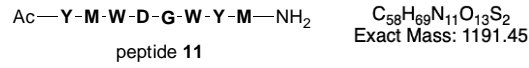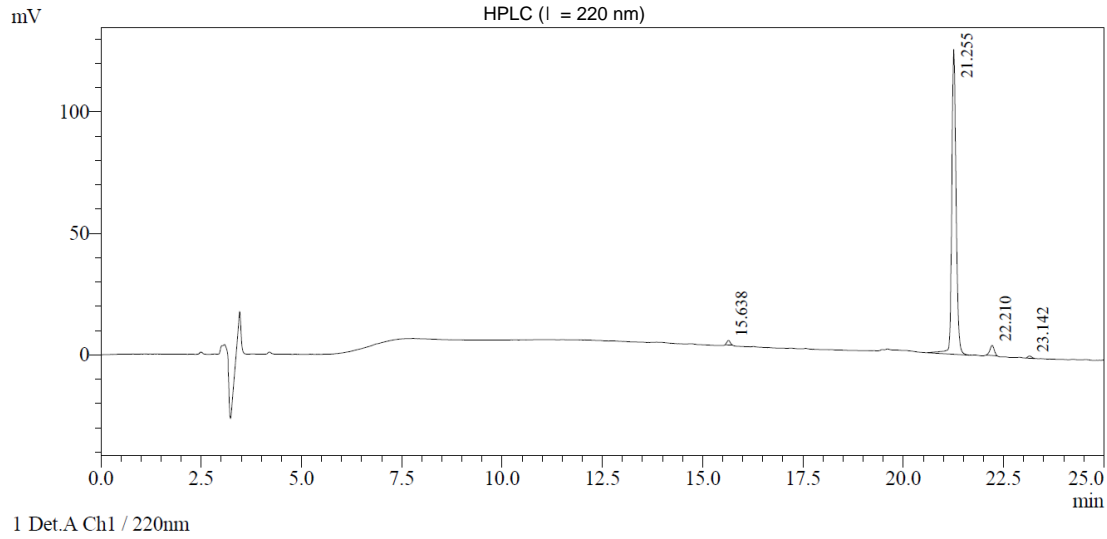

Peak Table

Detector A Ch1 220nm

| Peak# | Ret. Time | Area   | Height | Area %  |
|-------|-----------|--------|--------|---------|
| 1     | 15.638    | 10715  | 1852   | 1.085   |
| 2     | 21.255    | 939786 | 125408 | 95.122  |
| 3     | 22.210    | 30947  | 4168   | 3.132   |
| 4     | 23.142    | 6536   | 913    | 0.662   |
| Total |           | 987983 | 132341 | 100.000 |

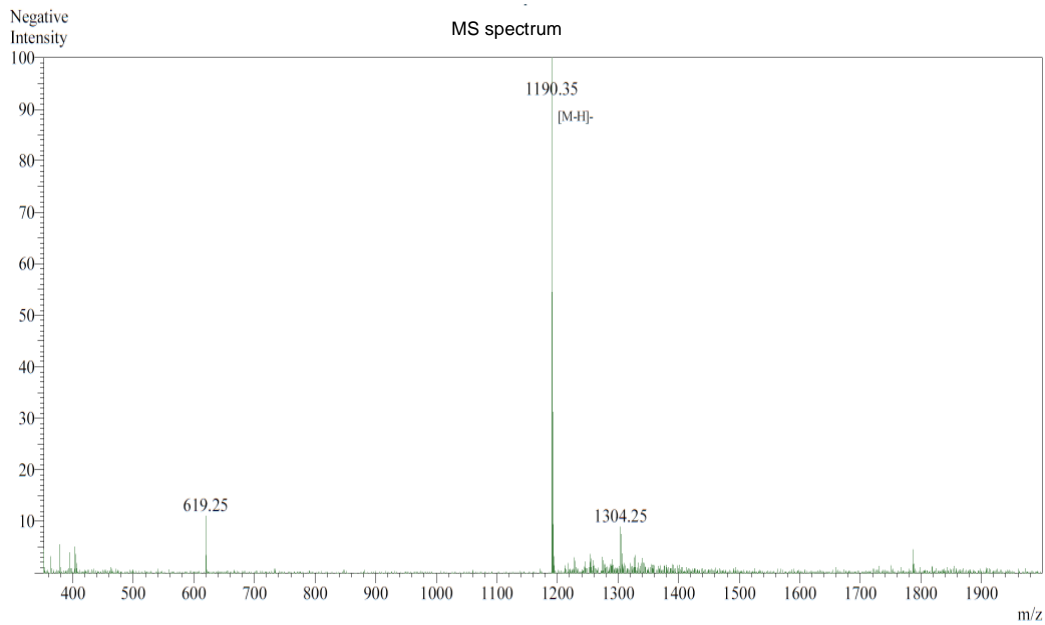

**Figure S15. HPLC chromatogram and MS spectrum, peptide 11 (purchased from Genscript).**

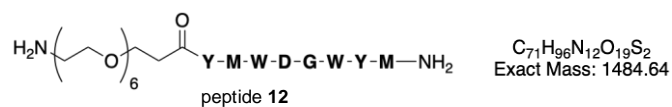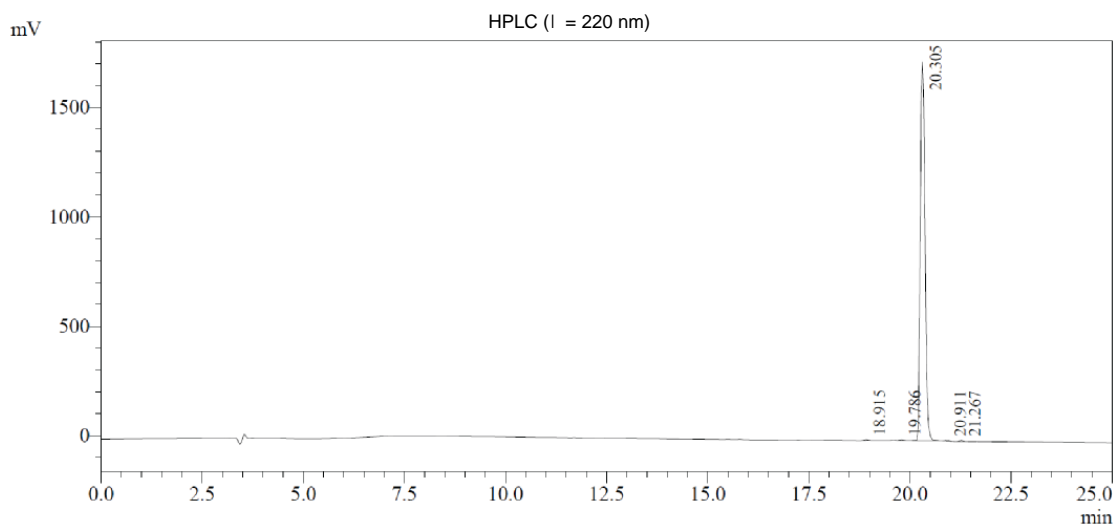

Peak Table

Detector A Ch1 220nm

| Peak# | Ret. Time | Area     | Height  | Area %  |
|-------|-----------|----------|---------|---------|
| 1     | 18.915    | 29718    | 4555    | 0.209   |
| 2     | 19.786    | 29396    | 4238    | 0.207   |
| 3     | 20.305    | 14085870 | 1731230 | 99.164  |
| 4     | 20.911    | 29628    | 3942    | 0.209   |
| 5     | 21.267    | 29949    | 4302    | 0.211   |
| Total |           | 14204560 | 1748266 | 100.000 |

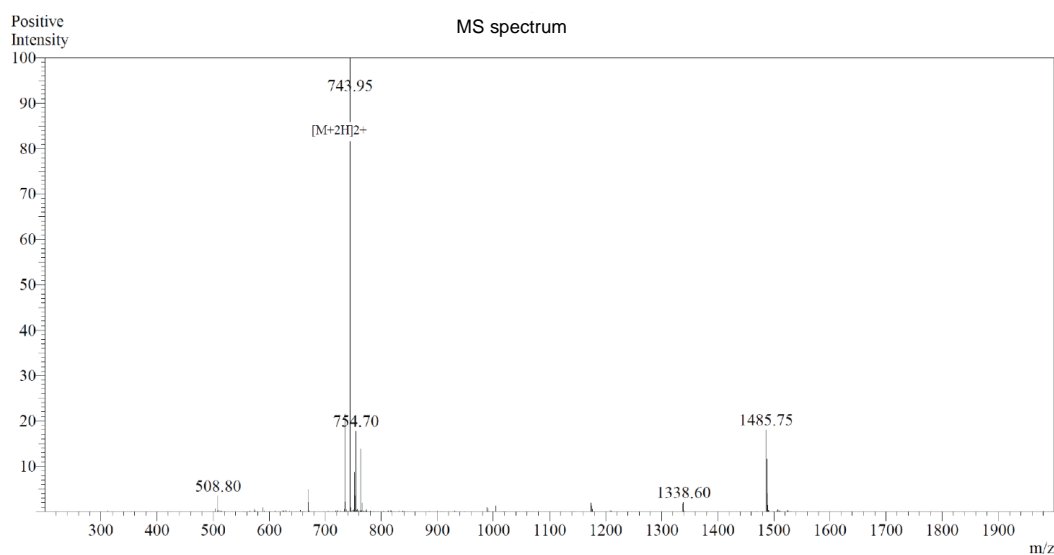

Figure S16. HPLC chromatogram and MS spectrum, peptide 12 (purchased from Genscript).

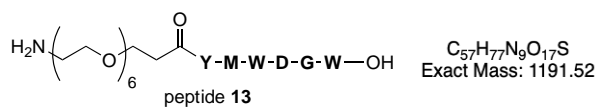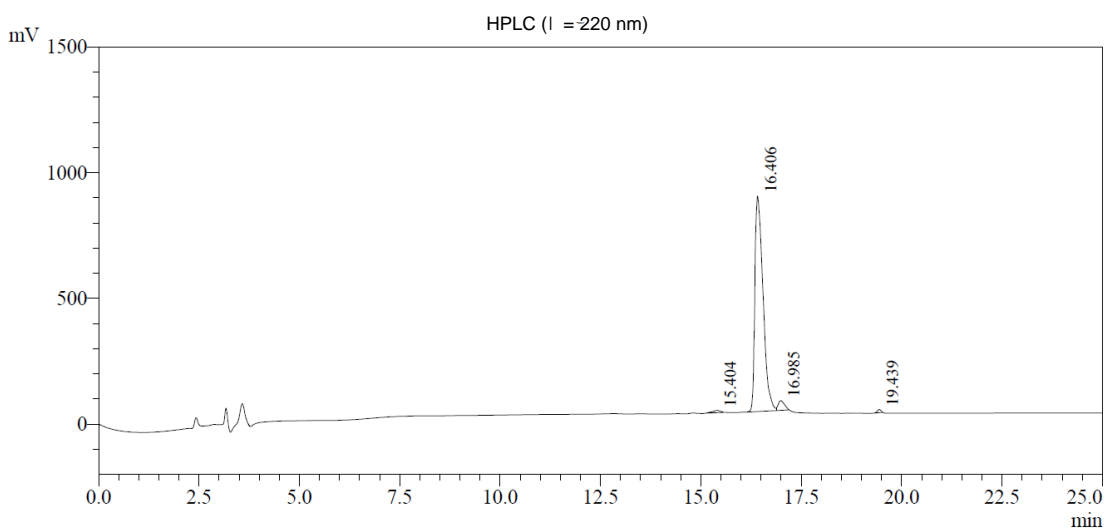

1 Det.A Ch1 / 214nm

Peak Table

Detector A Ch1 214nm

| Peak# | Ret. Time | Area     | Height | Area %  |
|-------|-----------|----------|--------|---------|
| 1     | 15.404    | 119943   | 9089   | 0.944   |
| 2     | 16.406    | 12079842 | 857140 | 95.117  |
| 3     | 16.985    | 418153   | 38831  | 3.293   |
| 4     | 19.439    | 82068    | 12879  | 0.646   |
| Total |           | 12700006 | 917939 | 100.000 |

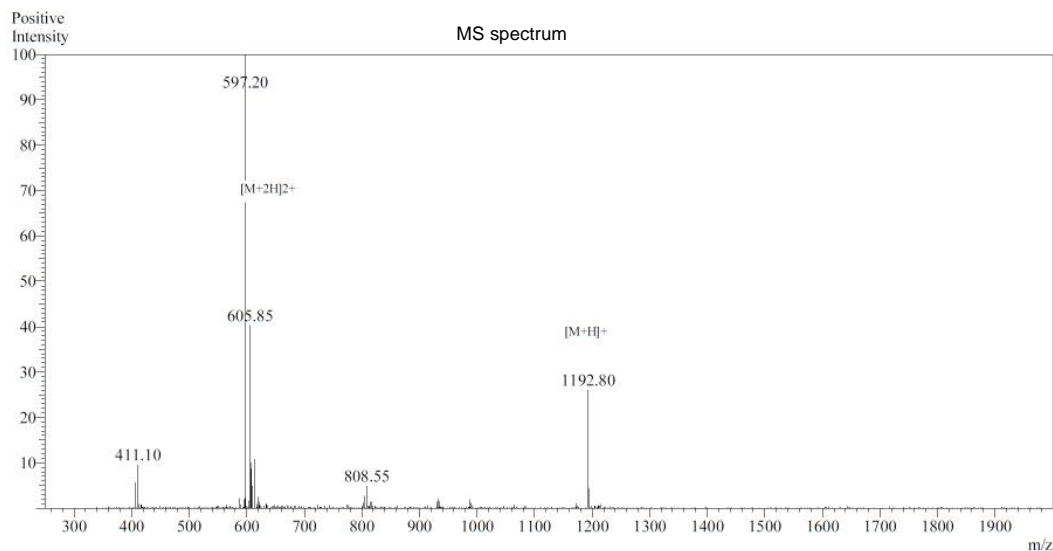

Figure S17. HPLC chromatogram and MS spectrum, peptide 13 (purchased from Genscript).

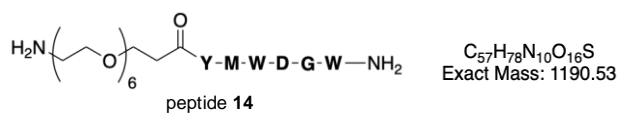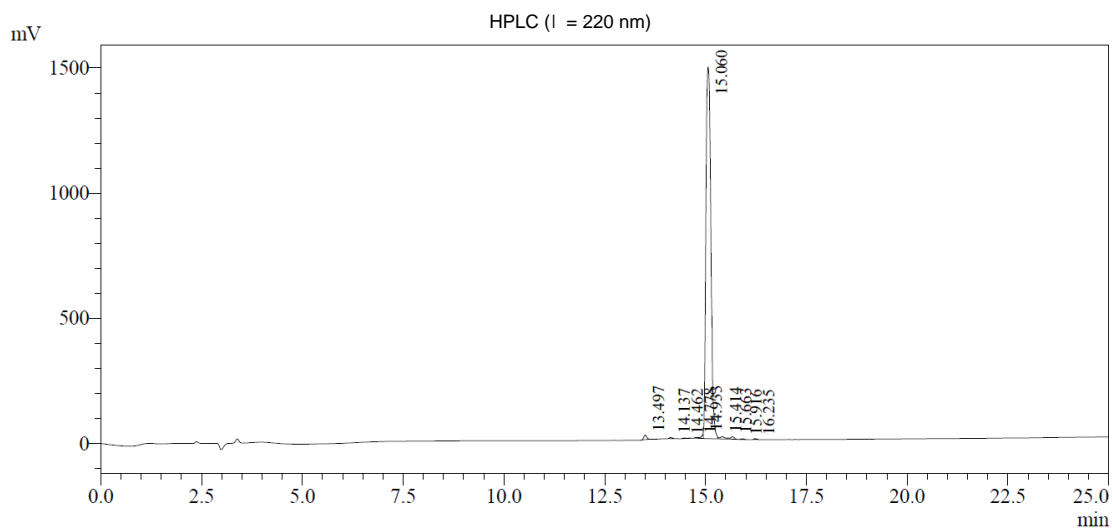

1 Det.A Ch1 / 220nm

Peak Table

Detector A Ch1 220nm

| Peak# | Ret. Time | Area     | Height  | Area %  |
|-------|-----------|----------|---------|---------|
| 1     | 13.497    | 93187    | 18325   | 0.716   |
| 2     | 14.137    | 22272    | 4489    | 0.171   |
| 3     | 14.462    | 17574    | 2324    | 0.135   |
| 4     | 14.778    | 26005    | 3772    | 0.200   |
| 5     | 14.933    | 49818    | 15961   | 0.383   |
| 6     | 15.060    | 12616304 | 1485741 | 96.935  |
| 7     | 15.414    | 85398    | 9360    | 0.656   |
| 8     | 15.663    | 74460    | 9636    | 0.572   |
| 9     | 15.916    | 13429    | 2479    | 0.103   |
| 10    | 16.235    | 16816    | 3662    | 0.129   |
| Total |           | 13015262 | 1555748 | 100.000 |

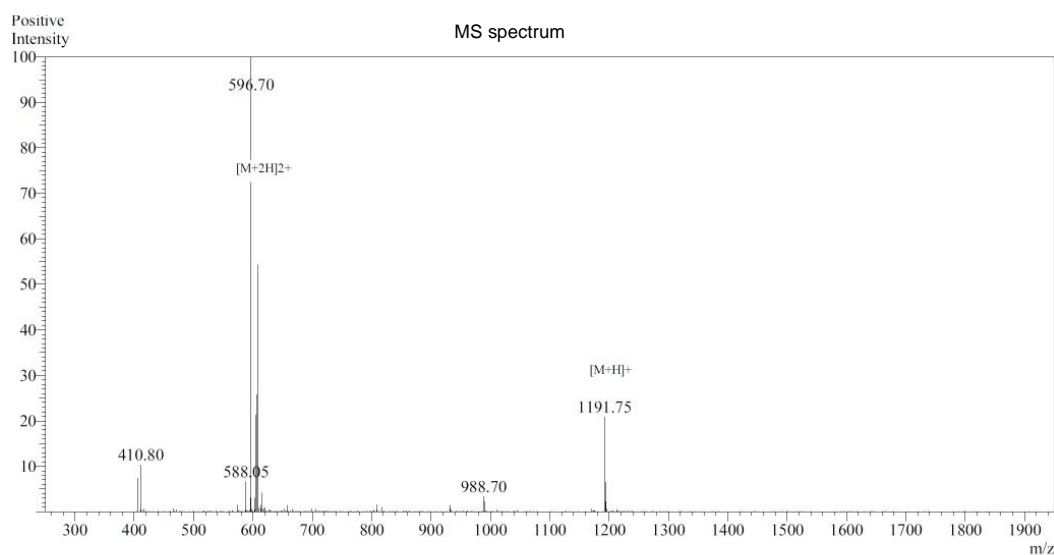

Figure S18. HPLC chromatogram and MS spectrum, peptide 14 (purchased from Genscript).

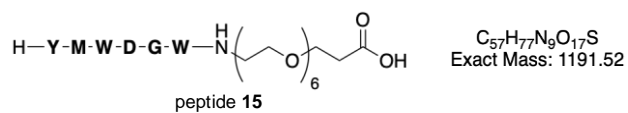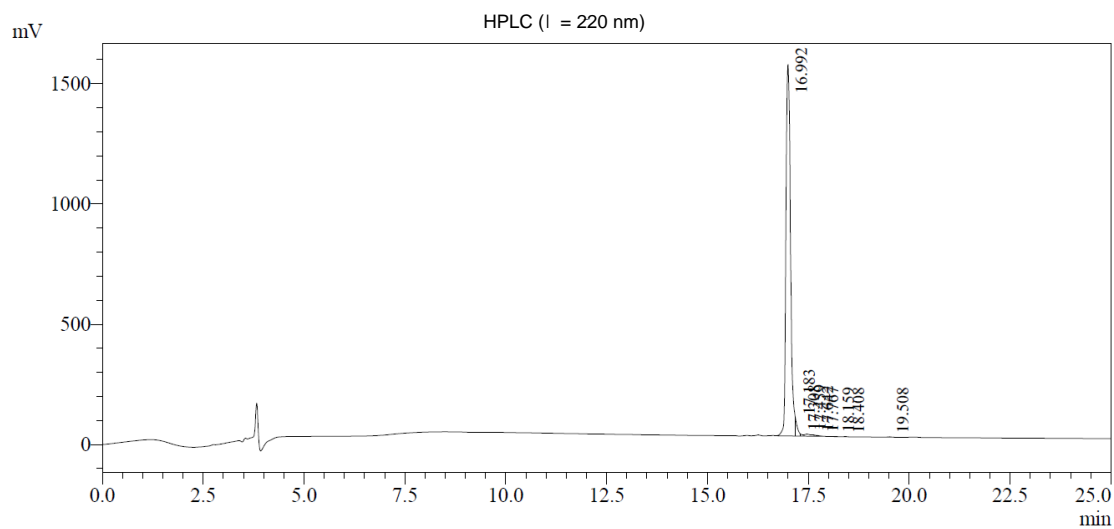

Peak Table

Detector A Ch1 220nm

| Peak# | Ret. Time | Area     | Height  | Area %  |
|-------|-----------|----------|---------|---------|
| 1     | 16.992    | 12109564 | 1543874 | 96.565  |
| 2     | 17.183    | 244954   | 71675   | 1.953   |
| 3     | 17.308    | 33001    | 8093    | 0.263   |
| 4     | 17.459    | 98778    | 8590    | 0.788   |
| 5     | 17.642    | 26744    | 5310    | 0.213   |
| 6     | 17.767    | 9108     | 2471    | 0.073   |
| 7     | 18.159    | 3307     | 653     | 0.026   |
| 8     | 18.408    | 5457     | 888     | 0.044   |
| 9     | 19.508    | 9406     | 1619    | 0.075   |
| Total |           | 12540319 | 1643174 | 100.000 |

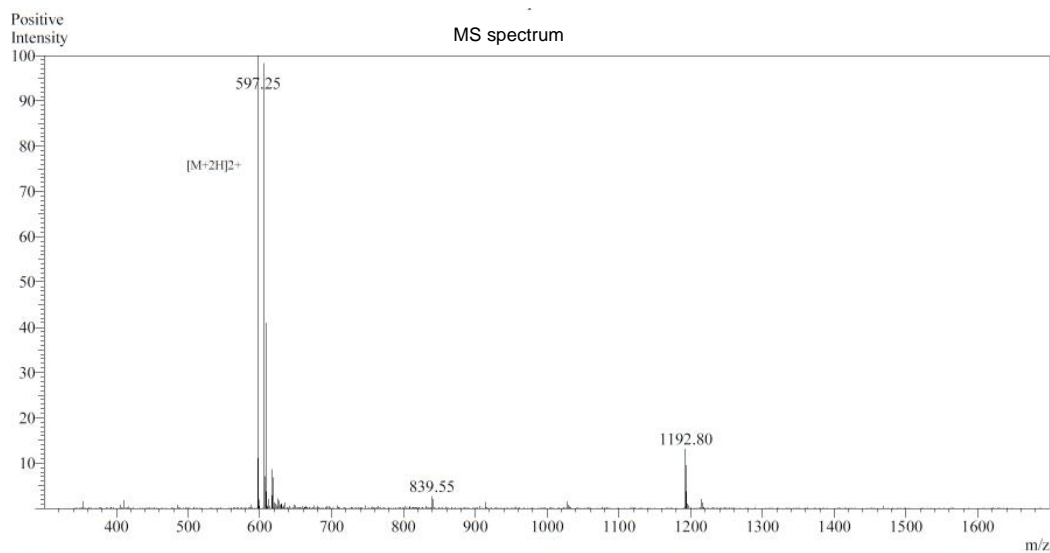

Figure S19. HPLC chromatogram and MS spectrum, peptide 15 (purchased from Genscript).



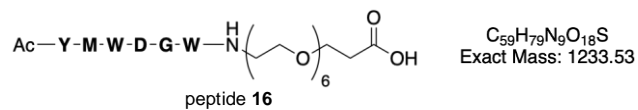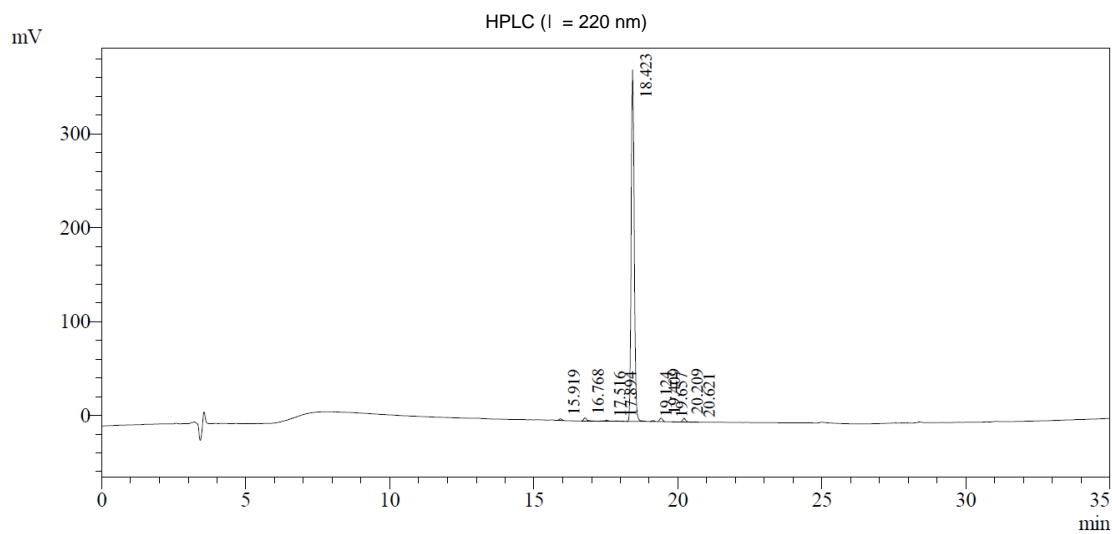

Peak Table

Detector A Ch1 220nm

| Peak# | Ret. Time | Area    | Height | Area %  |
|-------|-----------|---------|--------|---------|
| 1     | 15.919    | 12390   | 1755   | 0.428   |
| 2     | 16.768    | 26747   | 3353   | 0.924   |
| 3     | 17.516    | 7358    | 719    | 0.254   |
| 4     | 17.894    | 2891    | 327    | 0.100   |
| 5     | 18.423    | 2779212 | 374885 | 95.992  |
| 6     | 19.124    | 7545    | 1082   | 0.261   |
| 7     | 19.409    | 27108   | 3749   | 0.936   |
| 8     | 19.657    | 1080    | 105    | 0.037   |
| 9     | 20.209    | 29691   | 4094   | 1.025   |
| 10    | 20.621    | 1243    | 223    | 0.043   |
| Total |           | 2895266 | 390291 | 100.000 |

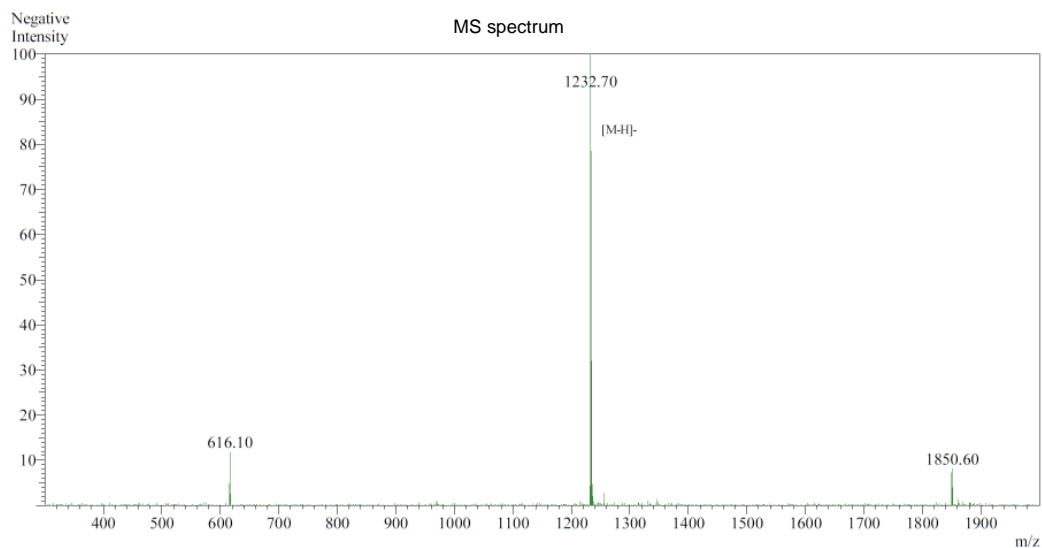

**Figure S20. HPLC chromatogram and MS spectrum, peptide 16 (purchased from Genscript).**

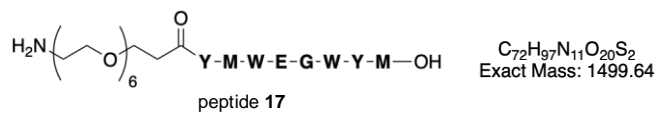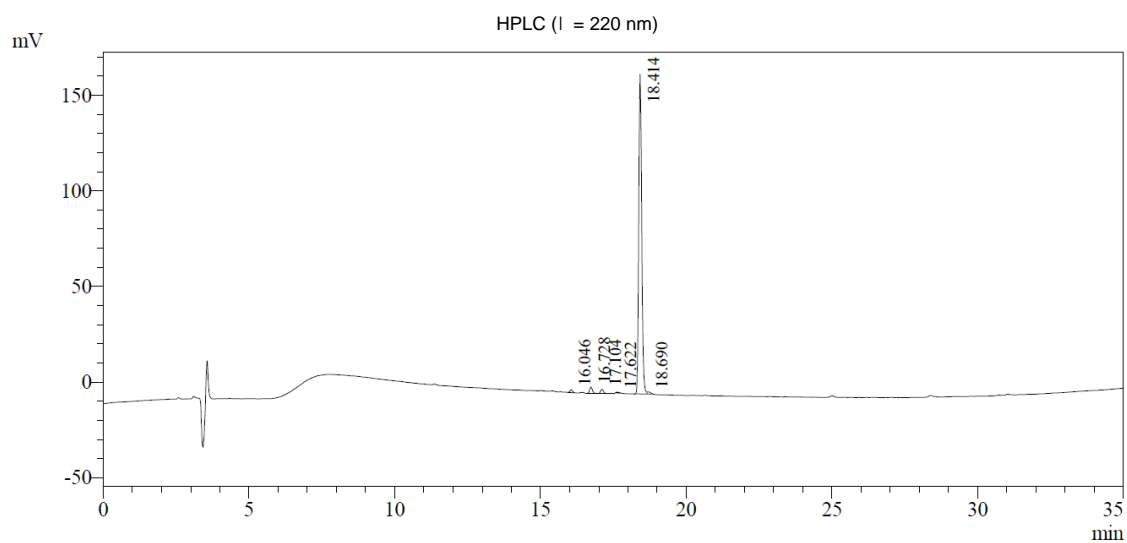

Peak Table

Detector A Ch1 220nm

| Peak# | Ret. Time | Area    | Height | Area %  |
|-------|-----------|---------|--------|---------|
| 1     | 16.046    | 9285    | 1432   | 0.743   |
| 2     | 16.728    | 21771   | 3273   | 1.742   |
| 3     | 17.104    | 14496   | 2101   | 1.160   |
| 4     | 17.622    | 4131    | 558    | 0.331   |
| 5     | 18.414    | 1192636 | 167296 | 95.419  |
| 6     | 18.690    | 7579    | 1079   | 0.606   |
| Total |           | 1249898 | 175739 | 100.000 |

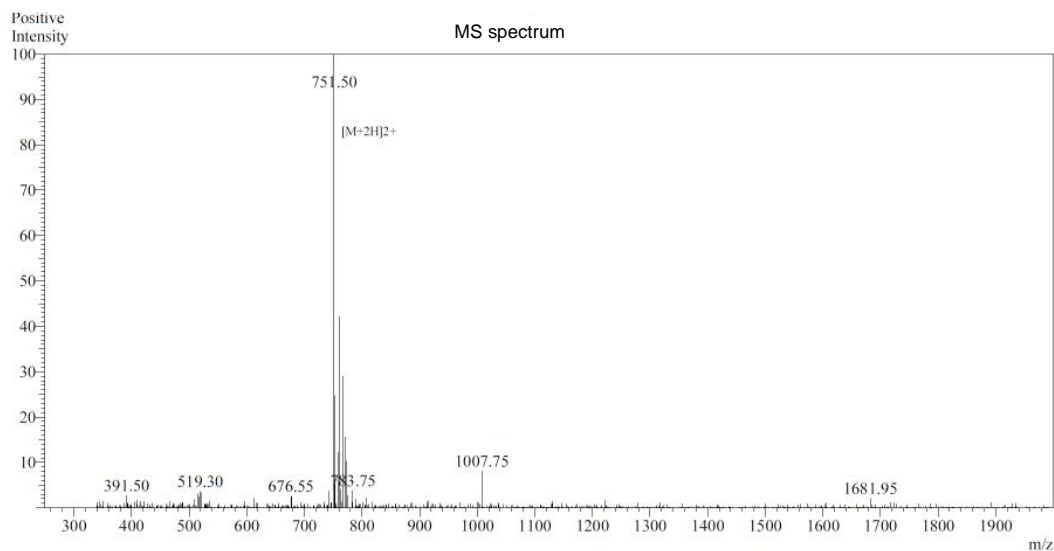

Figure S21. HPLC chromatogram and MS spectrum, peptide 17 (purchased from Genscript).

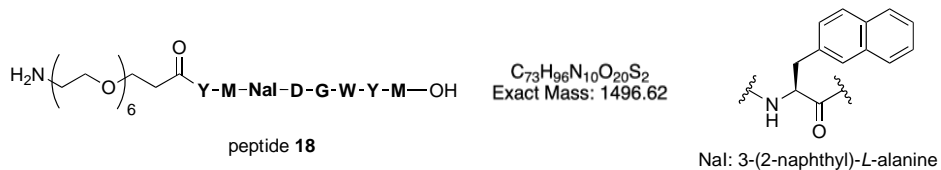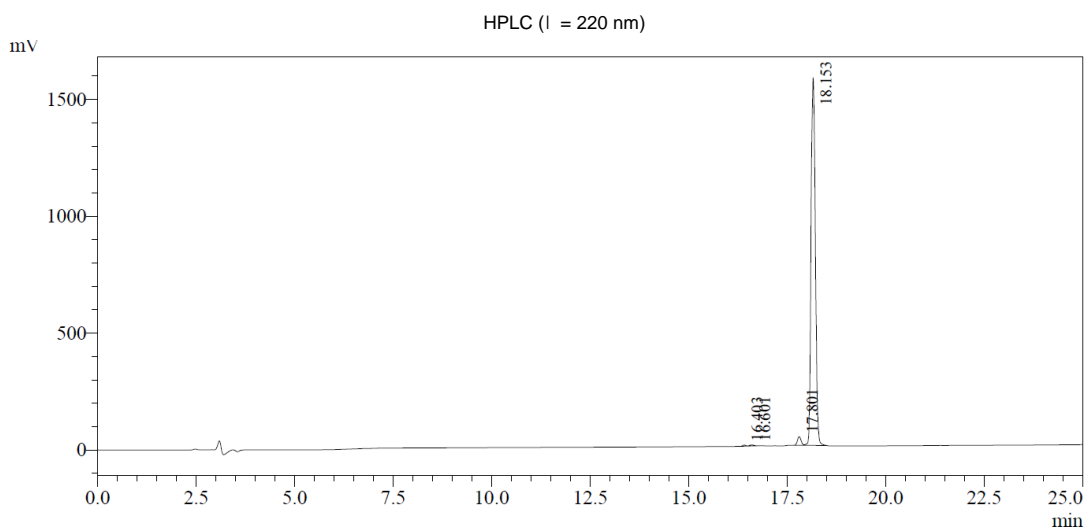

Peak Table

Detector A Ch1 220nm

| Peak# | Ret. Time | Area     | Height  | Area %  |
|-------|-----------|----------|---------|---------|
| 1     | 16.403    | 31290    | 5200    | 0.255   |
| 2     | 16.601    | 37047    | 4631    | 0.302   |
| 3     | 17.801    | 242968   | 37311   | 1.982   |
| 4     | 18.153    | 11945427 | 1573392 | 97.460  |
| Total |           | 12256731 | 1620534 | 100.000 |

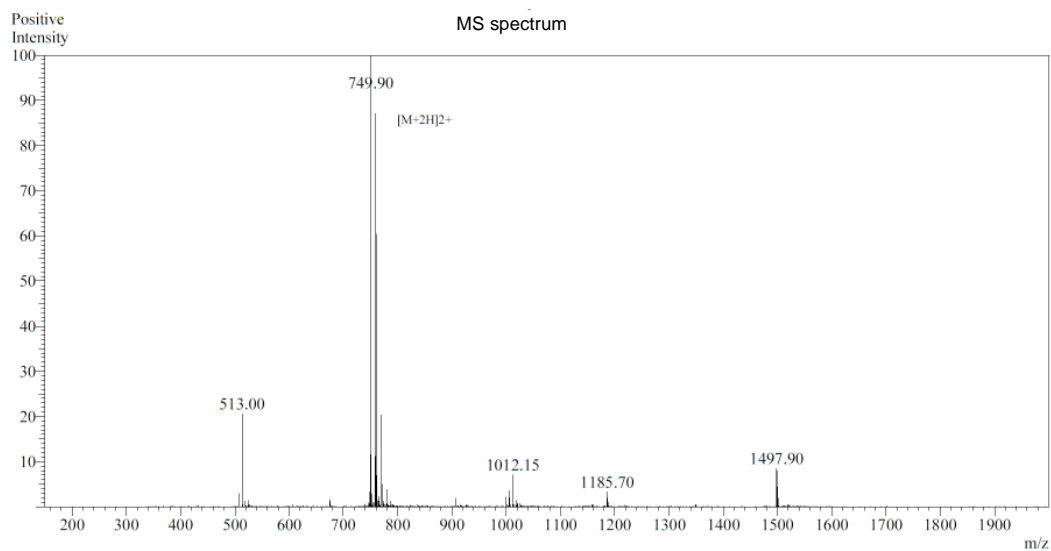

Figure S22. HPLC chromatogram and MS spectrum, peptide 18 (purchased from Genscript).

**Table S1. Data processing and refinement statistics for the structure determination of the 12: $\alpha$ -Cbtx complex.**

|                                           |              | <b>12:<math>\alpha</math>-Cbtx (PDBID 6ZFM)</b> |             |
|-------------------------------------------|--------------|-------------------------------------------------|-------------|
| Space group                               |              | P6 <sub>1</sub>                                 |             |
| Wavelength [Å]                            |              | 0.9762                                          |             |
| Unit cell                                 | a [Å]        | 49.4                                            |             |
|                                           | b [Å]        | 49.4                                            |             |
|                                           | c [Å]        | 289.6                                           |             |
|                                           | $\alpha$ [°] | 90.0                                            |             |
|                                           | $\beta$ [°]  | 90.0                                            |             |
|                                           | $\gamma$ [°] | 120.0                                           |             |
| Resolution [Å] <sup>a</sup>               |              | 29.75-1.68                                      | (1.71-1.68) |
| Unique reflections <sup>a</sup>           |              | 45,445                                          | (2,353)     |
| Multiplicity <sup>a</sup>                 |              | 9.6                                             | (9.8)       |
| I/ $\sigma$ <sup>a</sup>                  |              | 9.2                                             | (1.7)       |
| Completeness [%] <sup>a</sup>             |              | 100                                             | (100)       |
| R <sub>meas</sub> [%] <sup>a</sup>        |              | 10.4                                            | (160,6)     |
| CC(1/2) <sup>a</sup>                      |              | 96.9                                            | (51.5)      |
| Wilson B factor [Å <sup>2</sup> ]         |              | 38.3                                            |             |
| Refinement [Å]                            |              | 27.65-1.90                                      |             |
| Reflections                               |              | 31,224                                          |             |
| R <sub>work</sub> / R <sub>free</sub> [%] |              | 20.1/23.0                                       |             |
| rmsd bond distances [Å]                   |              | 0.006                                           |             |
| rmsd bond angles [°]                      |              | 0.938                                           |             |
| Ramachandran diagram [%]                  |              |                                                 |             |
|                                           | favored      | 97.06                                           |             |
|                                           | allowed      | 2.94                                            |             |
|                                           | outlier      | 0.00                                            |             |
| B value [Å <sup>2</sup> ]                 |              |                                                 |             |
|                                           | protein      | 53.7                                            |             |
|                                           | ligand       | 58.6                                            |             |
|                                           | waters       | 53.7                                            |             |
|                                           | overall      | 53.8                                            |             |

<sup>a</sup> Values in parenthesis refer to outer shell of reflections
